# Supplementary material for: Structural basis for botulinum neurotoxin E recognition of synaptic vesicle protein 2
Source: PubMed Central journal article supplement (PMC10125960; doi:10.1038/s41467-023-37860-8), 2023-04-24
Supplement: 41467_2023_37860_MOESM1_ESM.pdf [file 41467_2023_37860_MOESM1_ESM.pdf]

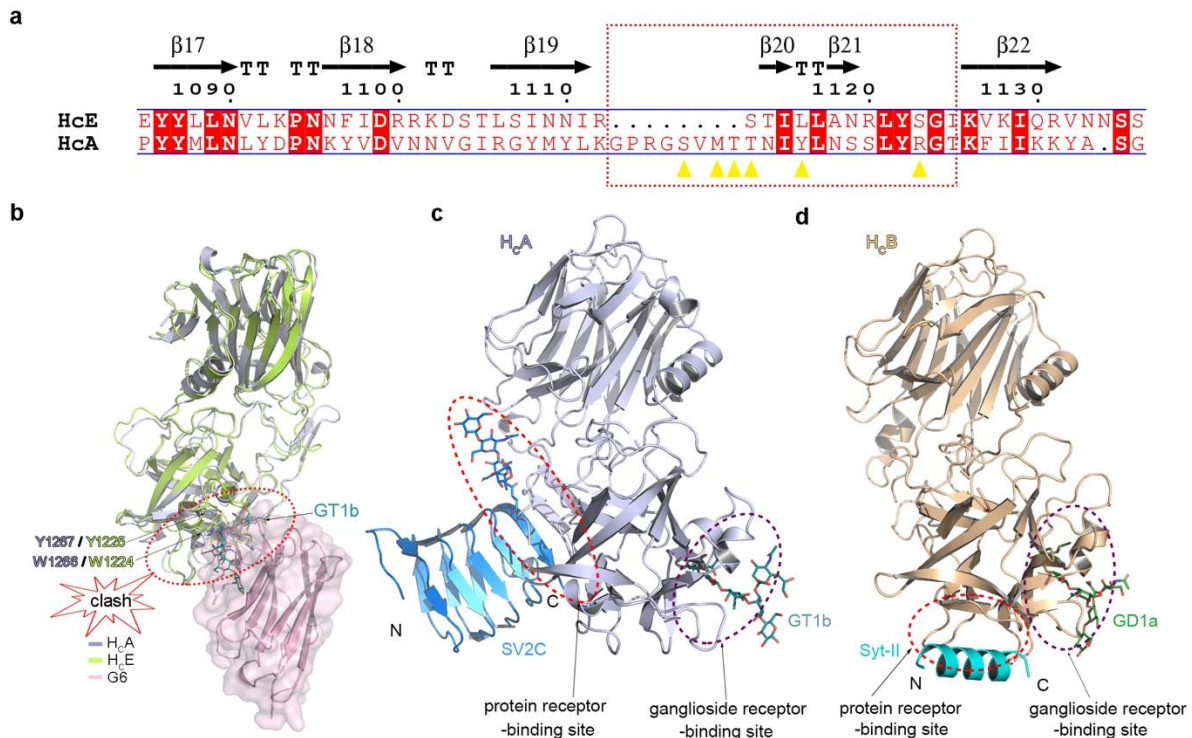

**Supplementary Figure 1. Comparing the receptor-binding modes among H<sub>C</sub>A, H<sub>C</sub>B, and H<sub>C</sub>E.** **a**, Amino acid sequence alignment between H<sub>C</sub>A and H<sub>C</sub>E (prepared using MultAlin<sup>1</sup> and ESPrpt 3.0<sup>2</sup>) focusing on the major area where H<sub>C</sub>A recognizes the protein moiety of SV2C. Identical residues are indicated with white letters on a red background and similar conserved residues are in red letters. The residues of H<sub>C</sub>A that bind to SV2C protein moiety are indicated by yellow triangles, and the major differences between H<sub>C</sub>A and H<sub>C</sub>E are highlighted in a red box. Residue numbers and the secondary structures of H<sub>C</sub>E are shown on the top. **b**, G6 occupies the ganglioside-binding pocket on H<sub>C</sub>E based on comparison of the H<sub>C</sub>E–G6 complex and the H<sub>C</sub>A–GT1b complex (PDB: 2VU9 [https://www.rcsb.org/structure/2VU9]): H<sub>C</sub>A (blue white cartoon); GT1b (deep teal sticks); H<sub>C</sub>E (lemon cartoon); G6 (pink surface and cartoon). Residues “WY” of the highly conserved “SxWY” motif are shown as sticks. **c**, A model of H<sub>C</sub>A in complex with SV2C and GT1b based on the structures of the H<sub>C</sub>A–SV2C (PDB: 5JLV [https://www.rcsb.org/structure/5JLV]) and the H<sub>C</sub>A–GT1b (PDB: 2VU9 [https://www.rcsb.org/structure/2VU9]) complexes: H<sub>C</sub>A (blue white); SV2C (blue); GT1b (deep teal sticks). **d**, H<sub>C</sub>B (wheat) in complex with Syt-II (cyan) and GD1a (green sticks) (PDB: 4KBB [https://www.rcsb.org/structure/4KBB]).

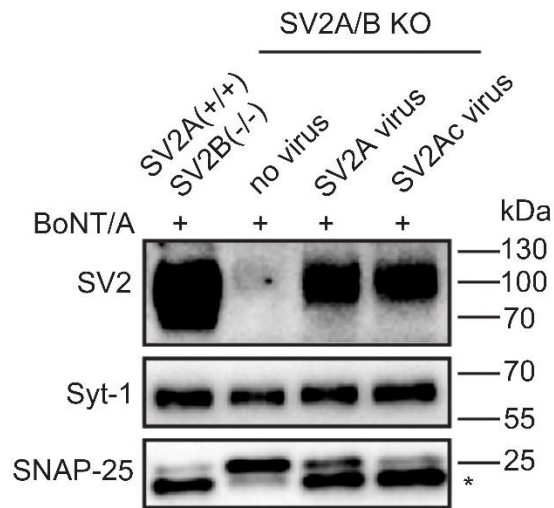

**Supplementary Figure 2. SV2Ac mediates BoNT/A entry into cultured cortical neurons.** The full-length SV2A and SV2Ac were expressed via lentiviral transduction in cortical neurons cultured from SV2A/B double KO mice. Neurons were exposed BoNT/A (100 pM, 24-hour incubation in medium). Cell lysates were collected and analyzed by immunoblot. The SNAP-25 antibody can detect both the intact SNAP-25 and the smaller fragment of SNAP-25 after cleavage by BoNT/A (marked with \*). Syt-1 was detected as a loading control. SV2A(+)/SV2B(-) neurons were tested in parallel as a positive control. A representative result is shown (n=2). Source data are provided as a Source Data file.

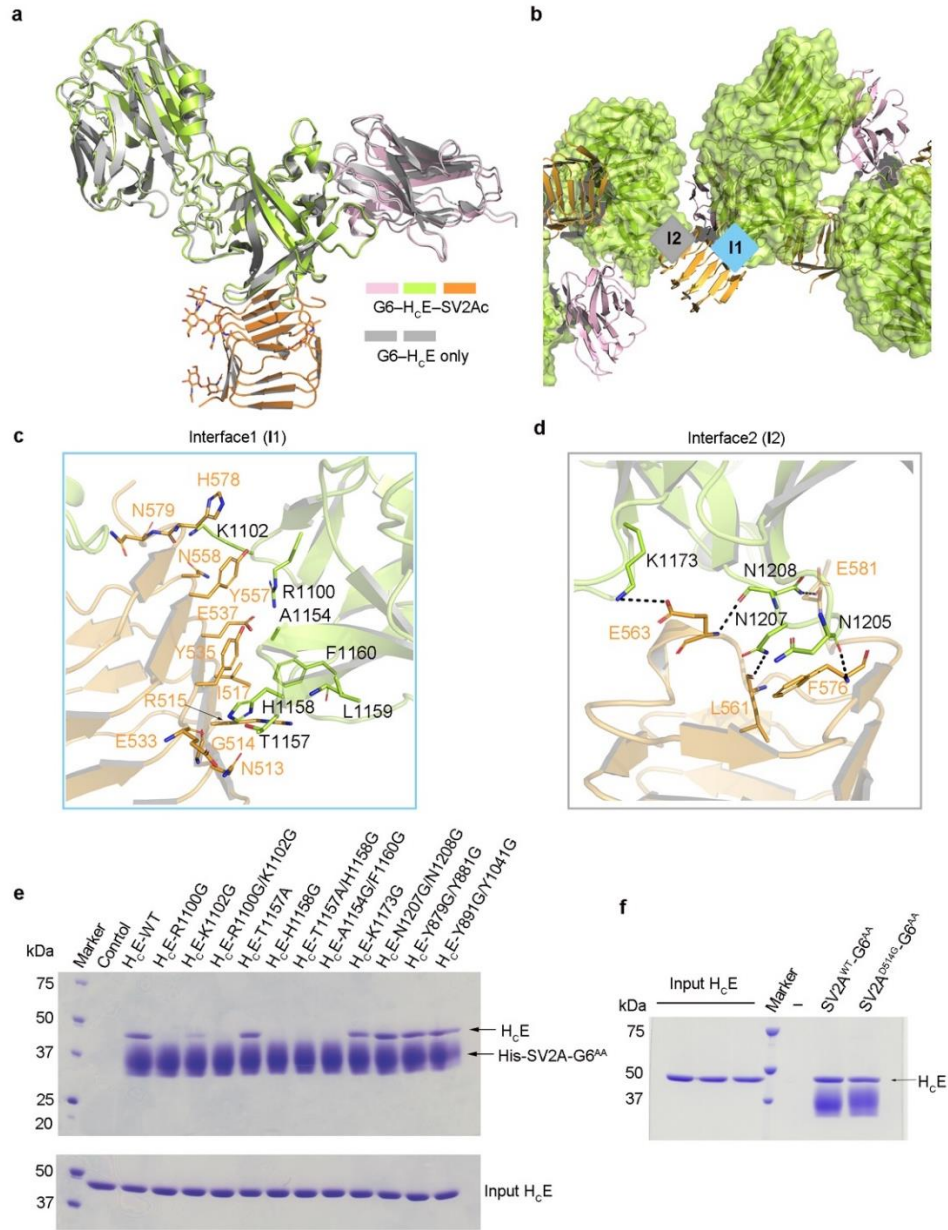

**Supplementary Figure 3. Structure of the H<sub>c</sub>E–SV2Ac–G6 complex and mutagenesis studies on H<sub>c</sub>E.**

**a**, The structure of the H<sub>c</sub>E–SV2Ac–G6 complex (H<sub>c</sub>E, lemon; G6, pink; SV2Ac, orange) is superimposed with the H<sub>c</sub>E–G6 complex (grey) based on H<sub>c</sub>E. It shows that the SV2Ac-linked G6 and the stand alone G6 bind to H<sub>c</sub>E in an identical manner. **b**, Two different interfaces were observed between SV2Ac and H<sub>c</sub>E in the crystal of the H<sub>c</sub>E–SV2Ac–G6 complex (I1 and I2). **c-d**, The interacting residues of SV2Ac and H<sub>c</sub>E at I1 and I2 are shown as sticks. **e**, Characterization of the interactions between H<sub>c</sub>E and SV2A by structure-based mutagenesis. Pull-down assays were performed using H<sub>c</sub>E variants as preys and the His-tagged SV2A–G6<sup>AA</sup> as a bait. **f**, SV2A<sup>D514G</sup> (D514 of SV2A was replaced with the equivalent G500 of SV2C) and SV2A<sup>WT</sup> bind to H<sub>c</sub>E with similar affinities based on a pull-down assay with H<sub>c</sub>E as a prey and the equal amount of His-tagged SV2A<sup>D514G</sup>–G6<sup>AA</sup> and SV2A<sup>WT</sup>–G6<sup>AA</sup> fusion proteins as baits. Representative results are shown in panels **e** and **f** (n=3).

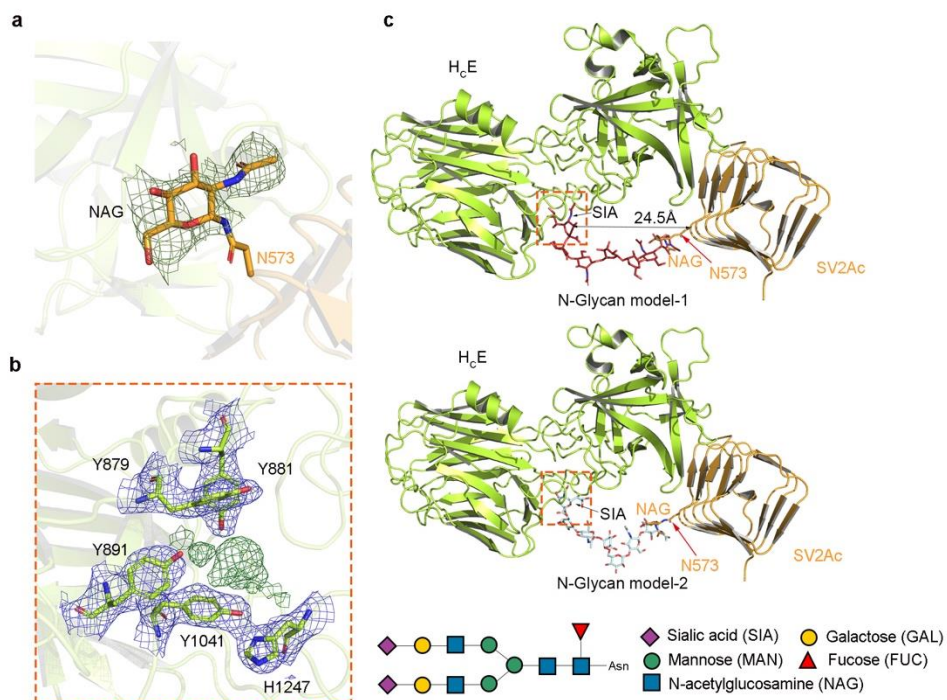

**Supplementary Figure 4. BoNT/E grips the distant tip of SV2A glycan.** **a**, The electron density of N-acetylglucosamines (NAG) of the SV2Ac-N573 glycan observed in the H<sub>C</sub>E–SV2Ac–G6 complex. An omit electron density map contoured at 1.5  $\sigma$  was overlaid with the final refined model. **b**, Electron densities for an unknown molecule were observed in a pocket located at the N-terminal sub-domain of H<sub>C</sub>E (H<sub>CNE</sub>). An omit electron density map contoured at 1.5  $\sigma$  (green) and a 2F<sub>O</sub>-F<sub>C</sub> electron density map for five selected residues (sticks) in this area contoured at 1  $\sigma$  (blue) were overlaid with the final refined model. **c**, Structure modeling of H<sub>C</sub>E binding to the SV2A N573 glycan. Two representative complex-type N-glycans are modeled to represent the SV2A-N573 glycan based on the structures of a glycan from human prostate-specific antigen (upper panel, red sticks, PDB: 3QUM [<https://www.rcsb.org/structure/3QUM>]) and a sialylated human IgG Fc (lower panel, pale cyan sticks, PDB: 4BYH [<https://www.rcsb.org/structure/4BYH>])). The terminal sialic acid of both glycans could reach the sialic acid-binding pocket on H<sub>C</sub>E (orange dotted area). A schematic representation of a complex-type N-glycan structures is shown at the bottom.

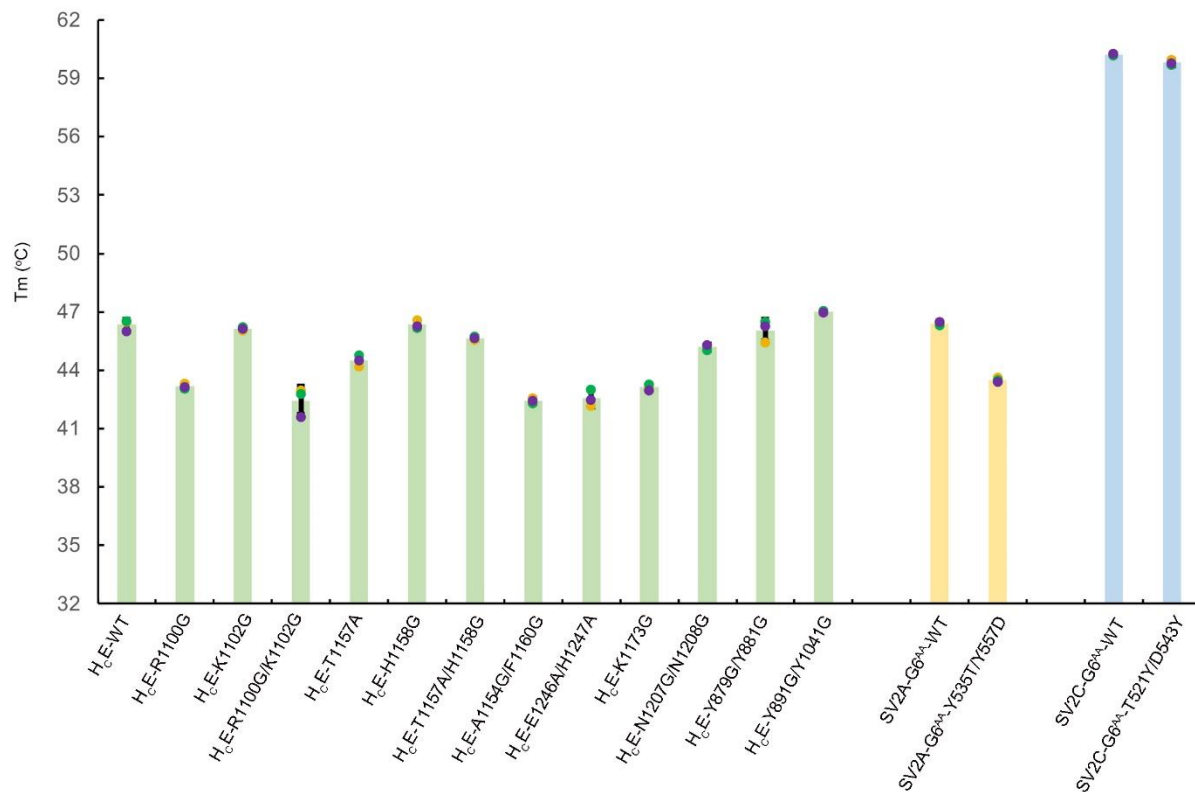

**Supplementary Figure 5. H<sub>c</sub>E, SV2A-G6<sup>AA</sup> and SV2C-G6<sup>AA</sup> variants adopt wild-type-like structures.**

The thermal stability of proteins was measured using a fluorescence-based thermal shift assay on a StepOne real-time PCR system (ThermoFisher). Protein melting was monitored using a hydrophobic dye, SYPRO Orange (Sigma-Aldrich), as the temperature was increased in a linear ramp from 25°C to 95°C. The midpoint of the protein-melting curve (T<sub>m</sub>) was determined using the software provided by the instrument manufacturer. The data are presented as means ± s.d. (n=3). All the H<sub>c</sub>E, SV2A-G6<sup>AA</sup> and SV2C-G6<sup>AA</sup> variants showed T<sub>m</sub> values comparable to the wild-type proteins, indicating correct protein folding.

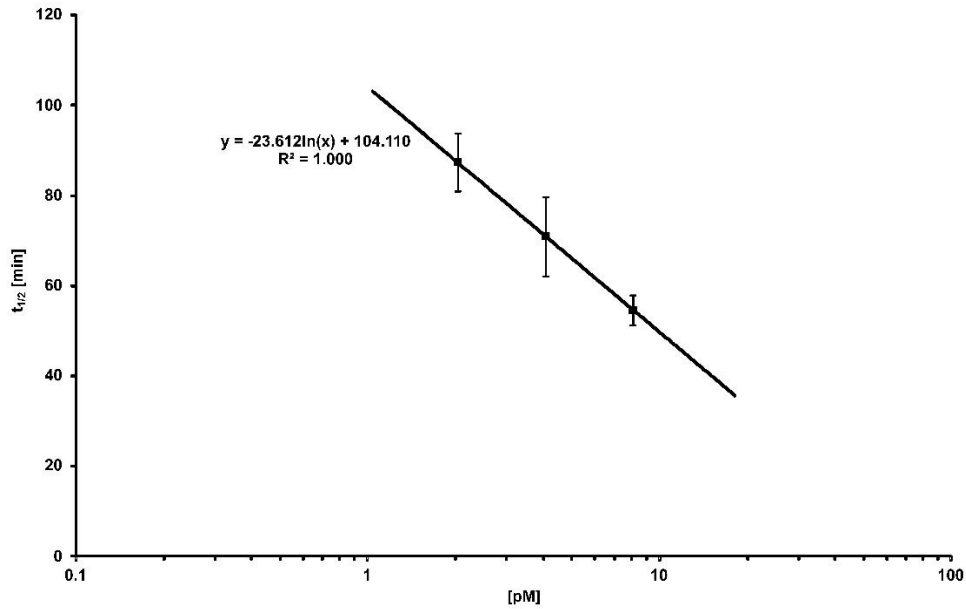

**Supplementary Figure 6. Dose-response curve of the wild-type BoNT/E1 in the mouse phrenic nerve hemidiaphragm assay.** To allow comparison of the altered neurotoxicity of mutants with BoNT/E1 wild-type, BoNT/E1 wild-type was tested in three concentrations (2.0 pM, n = 6; 4.0 pM, n = 8; 8.0 pM, n = 5 biologically independent experiments). A logarithmic function ( $y(\text{BoNT/E1 wt}; 2.0, 4.0, 8.0 \text{ pM}) = -23.61 \ln(x) + 104.11$ ,  $R^2 = 0.999$ ) was fitted to the data points (mean  $\pm$  SD) and used to convert paralytic-half-times of BoNT/E1 mutants into concentrations of the wild-type and finally expressed as relative neurotoxicity.

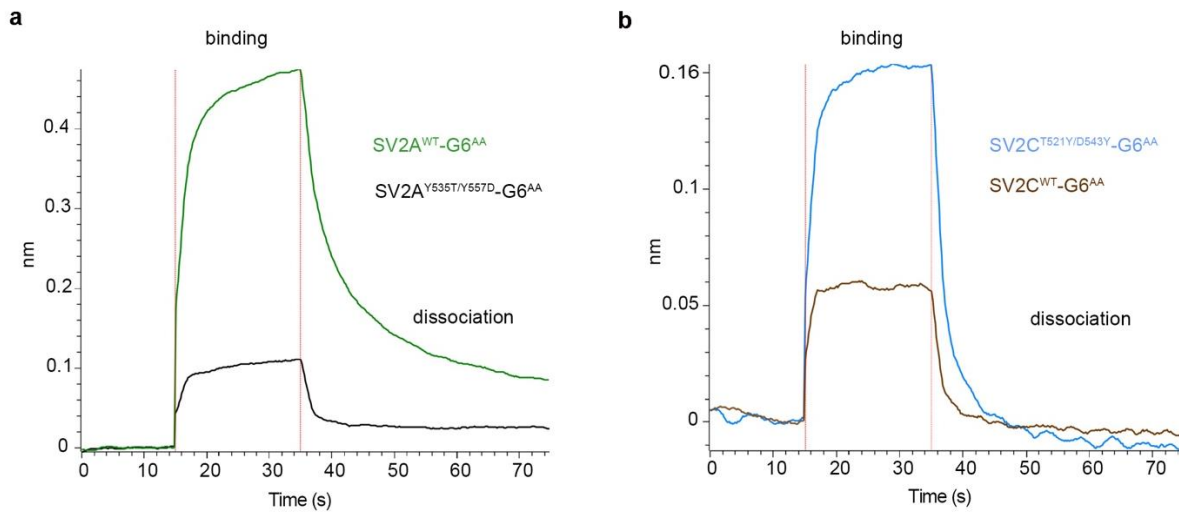

**Supplementary Figure 7. Bio-layer interferometry (BLI) analyses of SV2A-G6<sup>AA</sup> and SV2C-G6<sup>AA</sup> variants binding to HcE.** **a**, Equal amounts of biotinylated SV2A-G6<sup>AA</sup> or SV2A<sup>Y535T/Y557D</sup>-G6<sup>AA</sup> (400 nM) were immobilized on streptavidin (SA) biosensors as ligands and 1  $\mu$ M of HcE was used as the analyte. **b**, Equal amounts of biotinylated SV2C-G6<sup>AA</sup> or SV2C<sup>T521Y/D543Y</sup>-G6<sup>AA</sup> were immobilized on streptavidin (SA) biosensors as ligands and 1  $\mu$ M of HcE was used as the analyte.

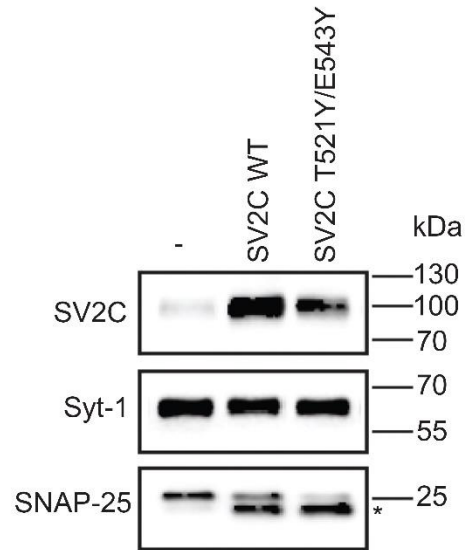

**Supplementary Figure 8. SV2C(T521Y/E543Y) mediates BoNT/A entry into cultured neurons.** The full-length SV2C and SV2C(T521Y/E543Y) were expressed via lentiviral transduction in cortical neurons cultured from SV2A/B KO mice. Neurons were exposed to BoNT/A (1 nM, 12 hours in medium). Cell lysates were harvested and analyzed by immunoblot assays. Cleaved SNAP-25 is marked with \*. Expression of SV2C is detected using a polyclonal anti-SV2C antibody. Both SV2C WT and SV2C(T521Y/E543Y) mediated entry of BoNT/A, resulting in cleavage of SNAP-25. A representative result is shown (n=2). Source data are provided as a Source Data file.



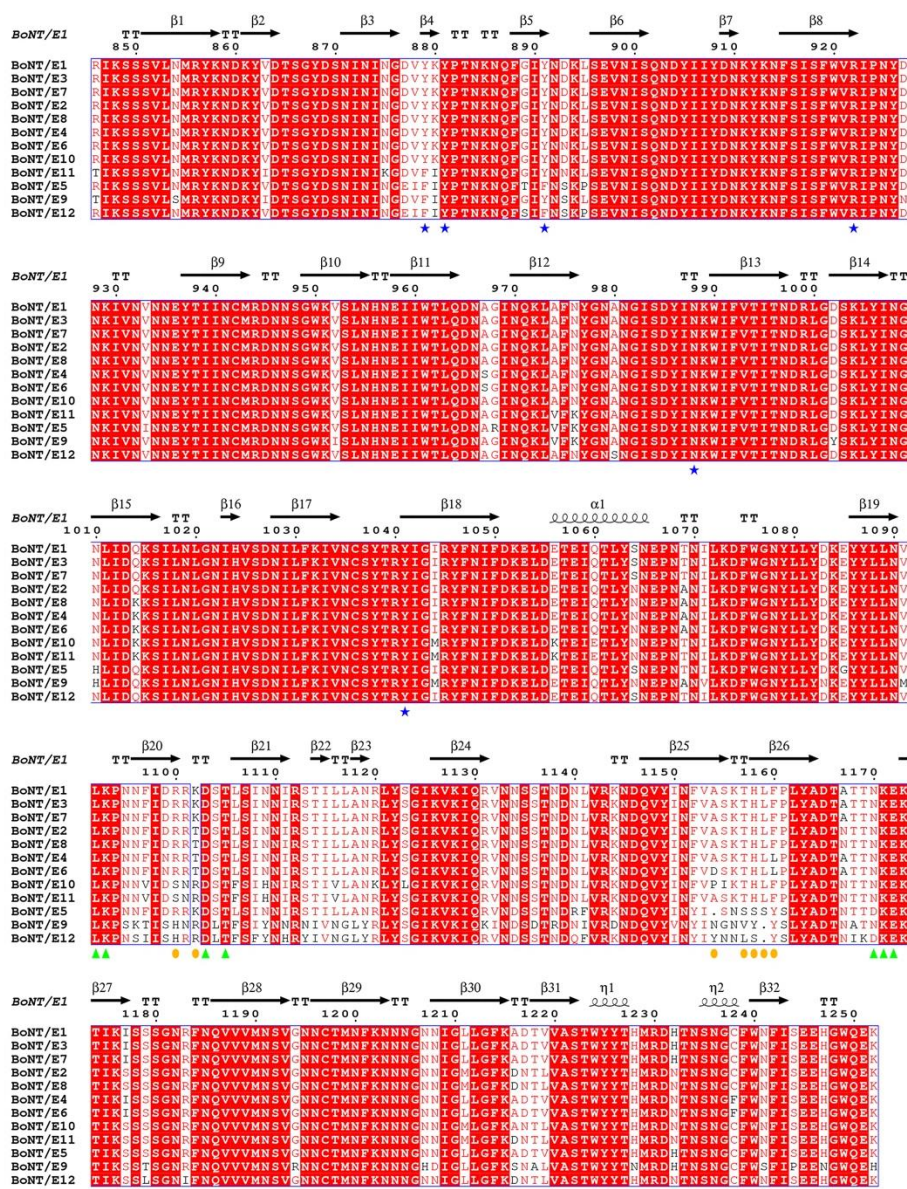

**Supplementary Figure 9. Sequence alignment among twelve BoNT/E subtypes.** The amino acid sequences of BoNT/E1-E12 are taken from GenBank: AFV91350 (E1), EF028404 (E2), ABM73980 (E3), EEP52948 (E4), AB037704 (E5), A8Y878 (E6), AER11391 (E7), AER11392 (E8), AFV91339 (E9), AII82300 (E10), KF861879 (E11), and KF929215 (E12). Key H<sub>C</sub>E residues that are recognized by VHH G6 are indicated by green triangles. H<sub>C</sub>E residues that interact with SV2Ac peptide or sialic acid are labeled by orange ovals or blue stars, respectively.

**Supplementary Table 1. Data collection, phasing and refinement statistics.**

|                                     | HcE-G6<br>(PDB: 7UIE)            | HcE-SV2Ac-G6<br>(PDB: 7UIA)      | HcE-SV2Ac-G6 (soaking SIA)<br>(PDB: 7UIB) |
|-------------------------------------|----------------------------------|----------------------------------|-------------------------------------------|
| <b>Data collection</b>              |                                  |                                  |                                           |
| Space group                         | P 21 21 21                       | C 2 2 21                         | C 2 2 21                                  |
| Cell dimensions                     |                                  |                                  |                                           |
| <i>a, b, c</i> (Å)                  | 88.74, 174.63,<br>214.44         | 140.74, 172.34,<br>137.16        | 141.37, 172.18, 137.05                    |
| $\alpha, \beta, \gamma$ (°)         | 90.00, 90.00, 90.00              | 90.00, 90.00, 90.00              | 90.00, 90.00, 90.00                       |
| Wavelength (Å)                      | 0.97918                          | 0.97918                          | 0.97918                                   |
| Resolution (Å)                      | 174.63 - 3.23<br>(3.32 - 3.23) * | 137.16 - 2.59<br>(2.67 - 2.59) * | 137.05 - 2.77<br>(2.87 - 2.77) *          |
| $R_{\text{merge}}$ (%)              | 22.4 (>100)                      | 9.8 (>100)                       | 9.0 (55.8)                                |
| $I/\sigma I$                        | 8.6 (1.0)                        | 19.9 (2.6)                       | 14.6 (3.2)                                |
| $CC_{1/2}$                          | 0.987 (0.333)                    | 0.999 (0.894)                    | 0.993 (0.900)                             |
| Completeness (%)                    | 99.6 (99.7)                      | 100 (100)                        | 99.8 (99.9)                               |
| Redundancy                          | 4.1 (4.2)                        | 12.1 (12.5)                      | 6.2 (6.8)                                 |
| <b>Refinement</b>                   |                                  |                                  |                                           |
| Resolution (Å)                      | 135.41 - 3.23<br>(3.32 - 3.23) * | 109.01 - 2.59<br>(2.67 - 2.59) * | 109.26 - 2.77<br>(2.87 - 2.77) *          |
| No. reflections                     | 53969                            | 52103                            | 42703                                     |
| $R_{\text{work}} / R_{\text{free}}$ | 23.0 / 27.3                      | 22.5 / 25.0                      | 23.5 / 26.1                               |
| No. atoms                           |                                  |                                  |                                           |
| Protein                             | 21293                            | 10169                            | 10189                                     |
| Ligand/ion                          | 0                                | 182                              | 202                                       |
| Water                               | 0                                | 159                              | 178                                       |
| <i>B</i> -factors                   |                                  |                                  |                                           |
| Protein                             | 91.95                            | 57.21                            | 55.52                                     |
| Ligand/ion                          | -                                | 80.87                            | 80.78                                     |
| Water                               | -                                | 43.24                            | 44.03                                     |
| Ramachandran plot                   |                                  |                                  |                                           |
| Favored (%)                         | 95.15                            | 94.6                             | 95.4                                      |
| Allowed (%)                         | 4.85                             | 5.4                              | 4.6                                       |
| Outliers (%)                        | 0                                | 0                                | 0                                         |
| R.m.s deviations                    |                                  |                                  |                                           |
| Bond lengths (Å)                    | 0.002                            | 0.005                            | 0.003                                     |
| Bond angles (°)                     | 0.48                             | 1.138                            | 0.814                                     |

\*Values in parentheses are for highest-resolution shell.

The dataset was derived from a single crystal.

### Supplementary Table 2. Protein-protein interactions in the BoNT/E–SV2Ac complex.

The amino acids on BoNT/A that are structurally equivalent to the SV2A-binding residues on BoNT/E are listed for comparison, while the BoNT/E-interacting residues on human SV2A and SV2B, and the equivalent residues on SV2C are also listed. The conserved residues are colored black, the homologous substitutions are in green, while non-homologous replacements are in red. The residues colored in light blue are involved in main-chain-mediated interactions.

| BoNT/A        | BoNT/E        | Type of interaction | SV2Ac     | SV2A | SV2B | SV2C |
|---------------|---------------|---------------------|-----------|------|------|------|
| E1190         | T1157         | HB                  | N513      | N513 | N456 | N499 |
| Y1191         | H1158         | HB                  | G514 (mc) | D514 | D457 | G500 |
| R1192         | L1159 (mc)    | HB                  | R515      | K515 | K458 | R501 |
| L1193         | F1160         | vdW                 | I517      | I517 | T460 | I503 |
| E1190         | T1157         | HB                  | E533 (mc) | E533 | E476 | S519 |
| L1193 / K1187 | A1154 / F1160 | vdW                 | Y535      | Y535 | Y478 | T521 |
| V1125         | R1100         | SB                  | E537      | E537 | E480 | E523 |
|               |               | HB                  | Y557      | Y557 | Y500 | D543 |
| N1127         | K1102         | HB                  | N558      | N558 | N501 | N544 |
|               |               | HB                  | H578 (mc) | H578 | E521 | H564 |
|               |               | HB                  | N579 (mc) | N579 | Q522 | N565 |

“SB”, “vdW”, and “HB” stand for salt bridge, van der Waals interaction, and hydrogen bond, respectively. “mc” indicates the main-chain-mediated contacts, and all the other contacts are mediated by side-chain atoms.

### Supplementary References

1. Corpet, F. Multiple sequence alignment with hierarchical clustering. *Nucleic Acids Res* **16**, 10881-90 (1988).
2. Robert, X. & Gouet, P. Deciphering key features in protein structures with the new ENDscript server. *Nucleic Acids Res* **42**, W320-4 (2014).
